# Supplementary material
Source: publisher figshare collection journal article supplement (https://sage.figshare.com/ndownloader/files/20754048)
Supplement: Supplementary file 1 [file 20754048]

## ONLINE SUPPLEMENT

### *Supplement Section A. Formal test*

A formal test of the visualization involves a fixed effects regression of pooled economic growth data. GDP per capita logged<sup>1</sup> is the dependent variable with two independent variables: (1) time and (2) years the carbon price policy is implemented (coded as 0 for years without the policy and 1 for years with the policy). While not included in the figure for visual uniformity, Australia's implementation of a carbon price was included in this analysis for the three years the country had a carbon price.

Table 1 displays fixed effects regression of economic growth on panel data from 1979 to 2018. The presence of a carbon price is not significant and has no effect on economic growth, while the passage of time remains strong and significant. This formal test confirms the data visualization.

**Table 1. Fixed Effects Regression of Economic Growth**

| <b>Variables</b>                 | <b>Model</b>         |
|----------------------------------|----------------------|
| <b>Time</b>                      | 0.017***<br>(0.0003) |
| <b>Carbon Price<br/>Presence</b> | - 0.016<br>(0.012)   |
| <b>R<sup>2</sup></b>             | 0.50                 |
| <b>N</b>                         | 800                  |

Note: Numbers in parentheses are standard errors.

\*p < 0.05, \*\*p < 0.01, \*\*\*p < 0.001

Data source: OECD

---

<sup>1</sup> The difference in logs between one year and the next is virtually identical to percentage change from one year to the next.

*Supplement Section B. Carbon Price Implementation of countries in paper*

| <b>Country</b>         | <b>Years Active</b> | <b>Country</b>              | <b>Years Active</b> |
|------------------------|---------------------|-----------------------------|---------------------|
| <b>Australia (AUS)</b> | 2012-2014           | <b>Japan (JPN)</b>          | 2012-present        |
| <b>Austria (AUT)</b>   | None                | <b>Netherlands (NLD)</b>    | None                |
| <b>Belgium (BEL)</b>   | None                | <b>New Zealand (NZL)</b>    | 2008-present        |
| <b>Canada (CAN)</b>    | 2019-present        | <b>Norway (NOR)</b>         | 1991-present        |
| <b>Denmark (DNK)</b>   | 1992-present        | <b>Portugal (PRT)</b>       | 2015-present        |
| <b>Finland (FIN)</b>   | 1990-present        | <b>Spain (ESP)</b>          | 2014-present        |
| <b>France (FRA)</b>    | 2014-present        | <b>Sweden (SWE)</b>         | 1991-present        |
| <b>Germany (DEU)</b>   | None                | <b>Switzerland (CHE)</b>    | 2008-present        |
| <b>Ireland (IRL)</b>   | 2010-present        | <b>United Kingdom (GBR)</b> | 2013-present        |
| <b>Italy (ITA)</b>     | None                | <b>United States (USA)</b>  | None                |

Source: World Bank Carbon Pricing Dashboard, 2019

### *Supplement Section C. Figure construction*

To construct the figures, I downloaded GDP per capita data from the OECD and also referenced the World Bank's "Carbon Pricing Dashboard" to identify years of carbon price adoption (cited below). I used R software and the 'ggplot2' graphics package to construct the figures. The command, `geom_line`, allowed me to graph a line for each country over time and the command, `geom_point`, allowed me to plot the year of carbon price adoption on each growth line.

#### **NORDIC COUNTRIES**

```
ggplot(gdppc, aes(Year)) + labs(colour = "Country") + geom_line(aes(y = DNK,
colour="DNK")) + geom_line(aes(y = FIN, colour="FIN")) + geom_line(aes(y =
SWE, colour="SWE")) + geom_line(aes(y = NOR, colour="NOR")) +
geom_point(aes(1992, 33935.59936, colour="DNK"))+ geom_point(aes(1990,
28100.03672, colour="FIN")) + geom_point(aes(1991, 29455.19939,
colour="SWE")) + geom_point(aes(1991, 40832.99758, colour="NOR"))+ labs(title
= "Nordic Countries") + theme_bw()+ scale_y_continuous("GDP per capita",
breaks = c(20000, 40000, 60000), limits = c(10000, 70000), labels =
c("$20000", "$40000", "$60000"))
```

#### **LIBERAL COUNTRIES**

```
ggplot(gdppc, aes(Year)) + labs(colour = "Country") + geom_line(aes(y = USA,
colour="USA")) + geom_line(aes(y = GBR, colour="GBR")) + geom_line(aes(y =
CAN, colour="CAN")) + geom_line(aes(y = AUS, colour="AUS")) + geom_line(aes(y
= IRL, colour="IRL")) + geom_line(aes(y = NZL, colour="NZL"))+
geom_point(aes(2010, 43298.66068, colour="IRL")) + geom_point(aes(2013,
37102.70953, colour="GBR")) + geom_point(aes(2008, 30937.47485,
colour="NZL")) + labs(title = "Liberal Countries") + theme_bw() +
scale_y_continuous("GDP per capita", breaks = c(20000, 40000, 60000), limits
= c(10000, 70000), labels = c("$20000", "$40000", "$60000"))
```

#### **CONTINENTAL COUNTRIES AND JAPAN**

```
ggplot(gdppc, aes(Year)) + labs(colour = "Country") + geom_line(aes(y = AUT,
colour="AUT")) + geom_line(aes(y = BEL, colour="BEL")) + geom_line(aes(y =
FRA, colour="FRA")) + geom_line(aes(y = DEU, colour="DEU")) + geom_line(aes(y
= JPN, colour="JPN")) + geom_line(aes(y = NLD, colour="NLD")) +
geom_line(aes(y = CHE, colour="CHE"))+ geom_point(aes(2014, 36644.29451,
colour="FRA")) + geom_point(aes(2012, 35613.13851, colour="JPN")) +
geom_point(aes(2008, 53684.94736, colour="CHE")) + labs(title = "Continental
Countries and Japan") + theme_bw() + scale_y_continuous("GDP per capita",
breaks = c(20000, 40000, 60000), limits = c(10000, 70000), labels =
c("$20000", "$40000", "$60000"))
```

#### **MEDITERRANEAN COUNTRIES**

```
ggplot(gdppc, aes(Year)) + labs(colour = "Country") + geom_line(aes(y = ESP,
colour="ESP")) + geom_line(aes(y = PRT, colour="PRT")) + geom_line(aes(y =
ITA, colour="ITA")) + geom_point(aes(2014, 30651.96849, colour="ESP")) +
geom_point(aes(2015, 26675.88564, colour="PRT"))+ labs(title = "Mediterranean
Countries") + theme_bw() + scale_y_continuous("GDP per capita", breaks =
c(20000, 40000, 60000), limits = c(10000, 70000), labels = c("$20000",
"$40000", "$60000"))
```

*Supplement Section D. Data Sources*

OECD. 2019. "Level of GDP per capita and productivity." *GDP per head of population in USD, constant prices, 2010 PPPs*. Accessed at:

[https://stats.oecd.org/Index.aspx?DataSetCode=PDB\\_LV](https://stats.oecd.org/Index.aspx?DataSetCode=PDB_LV)

World Bank. 2019. "Carbon Pricing Dashboard." Accessed at:

<https://carbonpricingdashboard.worldbank.org/>
